# 1 Synthetic Coolant WS-23 increases E-Cigarette Generated 2 Aerosolized Acellular Reactive Oxygen Species (ROS) Levels

3  
4 Shaiesh Yogeswaran<sup>a,1</sup>, Marko Manevski<sup>b</sup>, Hitendra S. Chand<sup>b</sup>, and Irfan Rahman<sup>a,\*</sup>

5 a. Department of Environmental Medicine, University of Rochester Medical Center, Box 850,  
6 601 Elmwood Avenue, Rochester, NY 14642, USA; [syogeswa@u.rochester.edu](mailto:syogeswa@u.rochester.edu) (SY)

7  
8 b. Department of Immunology and Nano-Medicine, Herbert Wertheim College of Medicine,  
9 Florida International University, Miami, FL, 33199, USA; [mmanevski@fiu.edu](mailto:mmanevski@fiu.edu) (MM)  
10 ;[hchand@fiu.edu](mailto:hchand@fiu.edu) (HSC)

11 \*Correspondence: [Irfan\\_Rahman@urmc.rochester.edu](mailto:Irfan_Rahman@urmc.rochester.edu) (IR); Tel.: +(585) 275-6911

12  
13 **Abstract:** There has been a substantial rise in e-cigarette (e-cig) use or vaping in the past decade,  
14 prompting growing concerns about their adverse health effects. Recently, e-cig manufacturers  
15 have been using synthetic cooling agents, like WS-23 and WS-3, to provide a cooling sensation  
16 without the “menthol taste”. Studies have shown that aerosols/vapes generated by e-cigs can  
17 contain significant levels of reactive oxygen species (ROS). However, studies investigating the  
18 role of synthetic coolants in modulating ROS levels generated by e-cigs are lacking. This study  
19 seeks to understand the potential of synthetic coolants, e-cigarette additives that have become  
20 increasingly prevalent in e-liquids sold in the United States (US), on acellular ROS production.  
21 Aerosols were generated from e-liquids with and without synthetic coolants through a single-puff  
22 aerosol generator; subsequently, acellular ROS was semi-quantified in H<sub>2</sub>O<sub>2</sub> equivalents via  
23 fluorescence spectroscopy. Our data suggest that adding WS-3 to e-liquid base (PG:VG),  
24 regardless of nicotine content, has a minimal impact on modifying e-cigarette-generated acellular  
25 ROS levels. Additionally, our data also suggest that the addition of WS-23 to nicotine-  
26 containing e-liquid base significantly modifies e-cigarette-generated acellular ROS levels.  
27 Together, our data provide insight into whether adding synthetic coolants to e-liquids  
28 significantly impacts vaping-induced oxidative stress in the lungs.

29  
30 **Keywords:** vaping; electronic nicotine delivery systems (ENDS); synthetic coolants, Reactive  
31 Oxygen Species (ROS), Acellular ROS, Cellular ROS, W-3, WS-23, e-cigarettes, oxidative  
32 stress

36

37 **1. Introduction:**

38 During the past few years, adolescent use of e-cigs or various electronic nicotine delivery  
39 systems (ENDS) has significantly increased, thus leading to an increase in the prevalence of E-  
40 cigarette or Vaping Associated Lung injury (EVALI) across the United States (King, Jones et al.  
41 2020). As of February 18, 2020, a total of 2,807 EVALI-related hospitalizations or deaths were  
42 reported to the Centers for Disease Control (CDC) from all 50 states (King, Jones et al. 2020).  
43 Consequently, the Food & Drug Administration (FDA) implemented an e-cigarette flavor  
44 enforcement policy banning the sales of all flavored cartridge-based nicotine-containing e-  
45 cigarette products, excluding tobacco and menthol flavors (Lu, Sun et al. 2022).

46 Following the FDA's 2020 flavor-enforcement policy, menthol-flavored e-cigarette sales had  
47 significantly increased in the US; specifically, there was a 54.5% increase in the market share of  
48 menthol-flavored e-cigarettes over four weeks and an 82.8% increase over eight weeks following  
49 the FDA's ruling (Diaz, Donovan et al. 2021). The cooling sensation created by menthol plays a  
50 significant role in the decision of both youth and adults to continue to vape, as it masks the bitter  
51 taste of nicotine (Davis, Morean et al. 2021). However, recently, more e-cigarette manufacturers  
52 have switched to non-menthol-containing flavoring chemicals to make e-cigarettes that give  
53 users a cooling sensation upon inhalation. These flavoring chemicals include synthetic coolants,  
54 like Methyl diisopropyl propionamide (WS-23) and N-Ethyl-2-isopropyl-5  
55 methylcyclohexanecarboxamide (WS-3) (Davis, Morean et al. 2021, Jabba, Erythropel et al.  
56 2022).

57 Examples of e-cigarette flavors containing WS-23 or WS-3 include e-cigarette flavors with  
58 "ice", "chilled", "cooled", and "polar" in their name; some of these e-cigarette flavors consist of  
59 flavor combinations with fruity and drink flavors, like "melon-ice", "blueberry-ice", and "iced-  
60 pink punch" (Leventhal, Dai et al. 2021). The significant increase in the marketing of  
61 "iced/cooled" flavored e-cigarettes in the U.S had occurred right around the time when sales of  
62 disposable e-cigarettes surged following the FDA's implementation of its March 2020 e-cigarette  
63 flavor enforcement policy (Leventhal, Dai et al. 2021). One lab found WS-23 to be a major  
64 component within the nicotine-containing e-liquid-pods, a type of ENDS, given to them by  
65 recovered EVALI patients in New York State (Lu, Li et al. 2021). Additionally, one study  
66 (Jabba, Erythropel et al. 2022) found that WS-23 was present in e-cigarettes marketed in the US  
67 at levels that may potentially result in exceeding the Margin of Exposure (MOE), a risk

68 assessment parameter for toxic compounds used by World Health Organization (WHO) (Jabba,  
69 Erythropel et al. 2022). Jabba, Erythropel et al. 2022's results suggest that those who use e-  
70 liquids comprised of W-3 or WS-23 are potentially at risk for long-term pulmonary health issues  
71 (Jabba, Erythropel et al. 2022).

72 Aerosols generated by e-cigarettes or other ENDS modalities have been found to contain  
73 dangerous chemicals, including formaldehyde and acetaldehyde, which are known to cause lung  
74 cancer and cardiovascular disease (Ogunwale, Li et al. 2017). Also, consistently, it has been  
75 found that dysregulated inflammatory cytokine output is an effect of chronic e-cig exposure in  
76 both *in vivo* and *in vitro* models (Davis, Sapey et al. 2022). Moreover, previous studies have  
77 shown that aerosols generated by flavored e-cigs produce significant levels of acellular reactive  
78 oxygen species (ROS) and induce cellular ROS in small airway epithelial cells (SAEC) (Zhao,  
79 Zhang et al. 2018, Yogeswaran, Muthumalage et al. 2021, Yogeswaran and Rahman 2022).  
80 ROS, either exogenous or when produced in excess endogenously, can lead to a redox imbalance  
81 in the lungs (Zuo and Wijegunawardana 2021). One study found tobacco smoke to contain a  
82 significant amount of free radicals,  $\sim 1 \times 10^{15}$  radicals per puff (Pryor and Stone 1993,  
83 Valavanidis, Vlachogianni et al. 2009, van der Toorn, Rezayat et al. 2009). ROS in smoke  
84 generated from conventional cigarettes, when inhaled, will react with antioxidants in the  
85 epithelial lining fluid (ELF) covering airway epithelial cells (Valavanidis, Vlachogianni et al.  
86 2009). Moreover, ROS in tobacco smoke, after reaching the ELF of airways, can lead to the  
87 destruction of endogenous antioxidants, thus significantly reducing cellular antioxidant capacity  
88 (van der Toorn, Rezayat et al. 2009). Oxidative stress induced by this redox imbalance has been  
89 implicated in the pathology of many types of lung diseases, such as acute respiratory distress  
90 syndrome (ARDS), asthma, and chronic obstructive pulmonary disease (COPD) (Zuo and  
91 Wijegunawardana 2021).

92 Studies so far have shown that exposure to e-cigarette aerosols induces oxidative stress in  
93 the lungs (Wang, Zhang et al. 2020). Regarding ROS-related e-cigarette studies, studies have  
94 shown that total acellular ROS levels in e-cigarette aerosols are dependent on brand, flavor,  
95 operational voltage, and puffing protocol, but no studies so far have sought to investigate the role  
96 synthetic coolants have in modifying total acellular ROS levels in e-cigarette aerosols (Zhao,  
97 Zhang et al. 2018). In this study, we seek to understand the role WS-23 and WS-3 have in  
98 potentially modifying acellular ROS levels in e-cigarette-generated aerosols.

99

100 **2. Materials & Methods:**

101 **2.1. Procurement of e-liquid constituents and composition of e-liquid solutions**

102 Propylene Glycol (PG), Vegetable Glycerin (VG), WS-23 solution (30% suspended in  
103 PG), and Koolada (10% WS-3 in PG) were purchased online from Flavor Jungle. 100  
104 mg/mL nicotine salt solution (50:50 PG-to-VG ratio) was purchased online from  
105 PERFECTVAPE. E-liquid solutions comprising of PG, VG, salt nicotine, Koolada,  
106 and WS-23 were made. For our acellular ROS assays, the following e-liquids were  
107 made (Table 1).

108 Table 1: Composition of E-liquids Analyzed

| <b>Composition of E-Liquid Solution</b> | <b>PG:VG Ratio (by mass)</b> | <b>Nicotine Concentration (% by mass)</b> | <b>Cooling Solution Added</b>         | <b>Cooling Solution Concentration (% by mass)</b> |
|-----------------------------------------|------------------------------|-------------------------------------------|---------------------------------------|---------------------------------------------------|
| PG:VG                                   | 50:50                        | 0.0                                       | None                                  | 0.0                                               |
| PG:VG (Nicotine)                        | 50:50                        | 5.0                                       | None                                  | 0.0                                               |
| PG:VG +Koolada                          | 50:50                        | 0.0                                       | FlavorJungle Koolada (10% WS-3 in PG) | 3.0                                               |
| PG:VG + WS-23                           | 50:50                        | 0.0                                       | FlavorJungle WS-23 (30% in PG)        | 3.0                                               |
| PG:VG (Nicotine) + Koolada              | 50:50                        | 5.0                                       | FlavorJungle Koolada (10% WS-3 in PG) | 3.0                                               |
| PG:VG (Nicotine) + WS-23                | 50:50                        | 5.0                                       | FlavorJungle WS-23 (30% in PG)        | 3.0                                               |

109

110

## 2.2. Generation of Aerosols, Fluorescence Spectroscopy, and Acellular ROS Quantification

Each e-liquid solution was added to a new, empty refillable JUUL Pod (OVNStech, Shenzhen, GD, China) (Mo: WO1 JUUL Pods) and aerosolized using a JUUL device (JUUL Labs Inc., Washington, DC, USA) (Mo: Rechargeable JUUL Device w/USB charger). Specifically, each JUUL device was attached to a Buxco Individual Cigarette Puff Generator (Data Sciences International (DSI), St. Paul, MN, USA) (Cat#601-2055-001), and subsequently, its component e-liquid was aerosolized and “bubbled” through 10mL of freshly made fluorogenic dye within a 50mL conical tube (Fig.1).

Cell permeant 2',7'-dichlorodihydrofluorescein diacetate (H<sub>2</sub>DCFDA) (EMD Biosciences, San Diego, CA, USA) (Cat # 287810) dissolved in 0.01N NaOH, phosphate buffer, PO<sub>4</sub>, and horseradish peroxidase (Thermo Fisher Scientific, Waltham, MA, USA (Cat# 31491) were used to make the fluorogenic dye. The aerosols generated from each e-liquid solution were individually bubbled through 10 mL of H<sub>2</sub>DCFDA solution at 1.5 L/min. A schematic of the e-cigarette aerosolization procedure is shown in Figure 1. Each JUUL-pod containing a respective e-liquid solution had undergone three separate puffing regimens to create three separate samples of bubbled dye solution. The same puffing regimen was used for “bubbling” filtered air through fluorogenic dye for a negative control. For our positive control, the smoke generated from a research cigarette (Kentucky Tobacco Research & Development Center in the University of Kentucky, Lexington, KY, USA) (Mo: 3R4F) was bubbled through the fluorogenic dye. After “bubbling,” each resulting fluorogenic dye sample was placed in a 37 °C degree water bath (VWR 1228 Digital Water Bath) for fifteen minutes; subsequently, the solution was analyzed via fluorescence spectroscopy using a spectrofluorometer (Turner Quantech fluorometer, Mo. FM109535) in fluorescence intensity units (FIU). Readings on the spectrofluorometer were measured as H<sub>2</sub>O<sub>2</sub> equivalents using a standard curve generated using the 0-50 μM H<sub>2</sub>O<sub>2</sub> standards made.

## 2.3. Statistical Analyses

143 One-way ANOVA, unpaired t-test, and Tukey's post-hoc tests were used for  
144 pairwise comparisons via GraphPad Prism Software version 8.1.1. Sample size  
145 was three. The results are shown as mean  $\pm$  SEM. Data were considered to be  
146 statistically significant for  $p$  values  $< 0.05$ .

147  
148  
149  
150

### 151 **3. Results:**

#### 152 **3.1. Aerosolized nicotine-containing e-liquid with WS-23 contains significant levels of** 153 **Acellular ROS**

154 The levels of acellular ROS generated by the PG:VG solution (2.02-2.60  $\mu\text{M H}_2\text{O}_2$ )  
155 were significantly higher than those generated by the filtered air control (0.96-1.66  
156  $\mu\text{M H}_2\text{O}_2$ ) (Fig.2a). When the levels of acellular ROS generated by the PG:VG  
157 solution containing nicotine (5%) (1.13-1.84  $\mu\text{M H}_2\text{O}_2$ ) and the filtered air  
158 control (0.96-1.66  $\mu\text{M H}_2\text{O}_2$ ) were compared, the generated ROS levels did not  
159 significantly differ (Fig.2b). The levels of ROS generated by the PG:VG with WS-23  
160 solution (1.21-4.16  $\mu\text{M H}_2\text{O}_2$ ) did not significantly differ from those generated by  
161 the aerosolized PG:VG solution nor from the levels of acellular ROS generated by  
162 the filtered air control (Fig.3a). However, the levels of acellular ROS generated by  
163 the aerosolized e-liquid solution containing PG:VG with nicotine (5%) and WS-23  
164 (3%) (1.94-2.95  $\mu\text{M H}_2\text{O}_2$ ) were significantly higher than those generated by the  
165 filtered air control (0.96-1.66  $\mu\text{M H}_2\text{O}_2$ ) (Fig.3b). In contrast, the levels of acellular  
166 ROS generated by the PG:VG solution containing nicotine and WS-23 (1.94-2.95  
167  $\mu\text{M H}_2\text{O}_2$ ) did not differ significantly from those generated by the PG:VG solution  
168 containing nicotine (Fig.3b). When the levels of acellular ROS generated by the  
169 PG:VG solution containing nicotine and Koolada (2.27-2.57  $\mu\text{M H}_2\text{O}_2$ ) and the  
170 filtered air control were compared, the generated ROS levels were significantly  
171 different (Fig.4a). However, the difference in acellular ROS levels between  
172 aerosolized PG:VG with Koolada solution and aerosolized PG:VG solution was not  
173 significant (Fig.4a). Additionally, the levels of ROS generated by the PG:VG  
174 solution with nicotine and Koolada (1.79-3.35  $\mu\text{M H}_2\text{O}_2$ ) did not significantly differ

175 from those generated by the aerosolized PG:VG with nicotine solution nor the  
176 filtered air control (Fig.4b).

177

### 178 **3.2 Koolada and WS-23 modify e-cigarette generated Acellular ROS Levels**

#### 179 **Similarly**

180 The levels of acellular ROS generated by the PG:VG (50:50) with Koolada (3%)  
181 solution did not significantly differ from those generated by the PG:VG (50:50) with  
182 WS-23 (3%) solution (Fig 5.a). Additionally, neither the difference in acellular ROS  
183 levels between the aerosolized PG:VG with Koolada solution and the filtered air  
184 control nor between the aerosolized PG:VG with WS-23 solution and the filtered air  
185 control were significant (Fig.5a). When comparing the levels of ROS generated by  
186 the PG:VG with Koolada and nicotine solution to those generated by the PG:VG  
187 with WS-23 and nicotine solution, we see that they did not significantly differ  
188 (Fig.5b). Moreover, neither the difference in acellular ROS levels between  
189 aerosolized PG:VG with Koolada solution and the filtered air control nor between the  
190 aerosolized PG:VG with WS-23 solution and filtered air control were significant  
191 (Fig.5b). Our data shows that regardless of nicotine content (0% or 5%), minimal  
192 differences in acellular ROS levels exist when comparing the addition of Koolada  
193 and WS-23 to e-liquid base (PG:VG) (Fig.5a-b).

194

195

## 196 **4. Discussion**

197 With the surge of e-cigarette use amongst youth in the US in 2021 and the recent influx of  
198 "cool/iced" e-cig flavors in US marketplaces, there is a greater need to fill the knowledge gap  
199 on the safety of inhaling synthetic-coolant additives (Chen-Sanke, Bover Manderski et al.  
200 2022). Our study sought to determine whether adding widely used synthetic coolants, WS-3  
201 and WS-23, in e-liquids modifies the level of acellular ROS generated in e-cigarette aerosols.  
202 Our data suggest that the addition of WS-3 to e-liquid base (PG:VG), regardless of whether it  
203 contains 0% nicotine or 5.0% nicotine, has a minimal impact on modifying e-cigarette-  
204 generated acellular ROS levels. More specifically, neither the difference in acellular ROS



205 levels between PG:VG with Koolada solution and PG:VG solution nor between PG:VG with  
206 Koolada and nicotine solution and PG:VG with nicotine solution were significant.

207 Additionally, our data suggest that the addition of WS-23 to e-liquid base (PG:VG) with 5%  
208 nicotine does significantly impact e-cigarette-generated acellular ROS levels. To explain, the  
209 difference in generated acellular ROS levels between PG:VG with nicotine and WS-23  
210 solution and the filtered air control was significant while that between the PG:VG with  
211 nicotine solution and filtered air control was not. Our data seems to suggest that synthetic  
212 coolants themselves have a limited impact in altering e-cig-generated acellular ROS levels  
213 generated from non-nicotine-containing e-liquids.

214 However, our findings concur with previous studies showing that aerosolized e-liquids  
215 contain significant levels of acellular ROS (Zhao, Zhang et al. 2018, Yogeswaran,  
216 Muthumalage et al. 2021). Regarding previous studies that analyzed acellular ROS levels  
217 within “cool/iced” flavored e-cigarettes, one study found differences in generated-acellular  
218 ROS levels between Tobacco-Derived Nicotine (TDN) and Tobacco-Free Nicotine (TFN)  
219 among cool/iced flavored e-cigarettes were minimal compared to tobacco and fruit flavors  
220 (Yogeswaran and Rahman 2022). In rodent studies, rats exposed to aerosolized e-liquid  
221 containing WS-23 at tested doses (via acute and subacute exposures) found no substantial  
222 changes in histopathologic analyses of vital organs nor relative organ weights (Wu, Liu et al.  
223 2021). This same study, via a bronchioalveolar lavage fluid (BALF) analysis, found no  
224 significant difference in neutrophil concentration between rats which had undergone repeated  
225 28-day WS-23 exposure and those apart of the respective control group (Wu, Liu et al. 2021).  
226 Neutrophils are major sources of endogenous ROS production.

227 Future studies aimed at understanding the role of WS-23 in modulating e-cig-induced  
228 oxidative stress should involve measurements of intracellular and extracellular ROS using  
229 isolated Polymorphonuclear Neutrophils (PMNs) (Kuhns, Priel et al. 2015). More  
230 specifically, PMNs isolated from blood collected from mice exposed to aerosolized e-liquids  
231 of varying WS-23 concentrations can be analyzed via luminol enhanced chemiluminescence  
232 exposure (Kuhns, Priel et al. 2015). The proposed experiment can provide insight into the  
233 differences between intra-and extra-cellular ROS of PMNs isolated from mice exposed to  
234 various concentrations of WS-23 (Kuhns, Priel et al. 2015). Regarding our understanding of



235 the effects of other e-liquid coolant additives, using human bronchial epithelial cell cultures,  
236 one study found that treatment with menthol significantly increased mitochondrial ROS via  
237 the TRPM8 receptor (Nair, Tran et al. 2020).

238 Regarding limitations in our study, our study did not include the treatment of airway epithelial  
239 cells with aerosolized e-liquids. Previous studies have shown that treatments with e-liquids  
240 induce significant levels of ROS production in Human Bronchial Epithelial cells (BEAS-2B)  
241 (Wang, Wang et al. 2021). Epithelial cells lining the airways are the first structural cell targets of  
242 any inhaled substances (Hiemstra, Tetley et al. 2019). Likewise, a better understanding of how  
243 synthetic coolants modulate e-cigarette-induced oxidative stress in the lungs can be obtained  
244 through cellular ROS assays. More specifically, future studies should conduct a staining  
245 MitoSress assay using airway epithelial cells exposed to aerosolized e-liquids containing various  
246 concentrations of synthetic coolants (WS-3 and WS-23) (Muthumalage, Lamb et al. 2019).  
247 Through this proposed assay, an understanding of how exposure to aerosolized synthetic  
248 coolants affects mitochondrial ROS production can be obtained. However, our study has shown  
249 that the addition of WS-3 and WS-23 to e-liquids has a minimal effect on modifying acellular  
250 ROS levels within aerosolized non-nicotine-containing e-liquid base. Thus, these preliminary  
251 findings indicate the need for further evaluation on the potential health risks associated with  
252 inhaling newly marketed e-cigarettes containing synthetic coolants. Specifically, our findings  
253 highlight the need for further investigation into the role of WS-3 and WS-23 in disrupting the  
254 endogenous oxidant and antioxidant balance in airways upon inhalation.

255

256

257

258

259

260

261

262

263 **Acknowledgments:** Figure 1 and the Graphical Abstract were made using BioRender and  
264 AdobeIllustrator. Figures 2,3,4, and 5 were made using GraphPadPrism. Joseph Lucas (JL) and  
265 Dr. Thivanka Muthumalage (TM) for technical help and discussions.

266 **Author Contributions:** Conceptualization, I.R.; methodology, I.R.; assay performance: S.Y,  
267 software, S.Y.; validation, S.Y, I.R.; formal analysis, S.Y.; investigation, S.Y.; re-sources, I.R.;  
268 data curation, S.Y.; writing—original draft preparation, S.Y and I.R.; writing—review and  
269 editing, S.Y., M. M., H.S.C., and I.R.; visualization, S.Y.; supervision, I.R.; project  
270 administration, I.R.; funding acquisition, I.R. All authors have read and agreed to the published  
271 version of the manuscript.

272 **Funding:** This research was supported by our TCORS Grant: CRoFT 1 U54 CA228110-01.

273 **Informed Consent Statement:** Not applicable; no human subjects were involved.

274 **Data Availability Statement:** We declare that we have provided all the data in figures.

275 **Conflicts of Interest:** The authors declare no conflicts of interest.

276  
277  
278  
279  
280  
281  
282

283 **References:**

284

285

- 286 1. Chen-Sankey, J., M. T. Bover Manderski, W. J. Young and C. D. Delnevo (2022).  
287 "Examining the Survey Setting Effect on Current E-Cigarette Use Estimates among High  
288 School Students in the 2021 National Youth Tobacco Survey." Int J Environ Res Public  
289 Health **19**(11).
- 290 2. Davis, D. R., M. E. Morean, K. W. Bold, D. Camenga, G. Kong, A. Jackson, P. Simon and  
291 S. Krishnan-Sarin (2021). "Cooling e-cigarette flavors and the association with e-cigarette  
292 use among a sample of high school students." PLoS One **16**(9): e0256844.
- 293 3. Davis, L. C., E. Sapey, D. R. Thickett and A. Scott (2022). "Predicting the pulmonary  
294 effects of long-term e-cigarette use: are the clouds clearing?" Eur Respir Rev **31**(163).
- 295 4. Diaz, M. C., E. M. Donovan, B. A. Schillo and D. Vallone (2021). "Menthol e-cigarette  
296 sales rise following 2020 FDA guidance." Tob Control **30**(6): 700-703.
- 297 5. Hiemstra, P. S., T. D. Tetley and S. M. Janes (2019). "Airway and alveolar epithelial cells  
298 in culture." Eur Respir J **54**(5).
- 299 6. Jabba, S. V., H. C. Erythropel, D. G. Torres, L. A. Delgado, J. G. Woodrow, P. T. Anastas,  
300 J. B. Zimmerman and S. E. Jordt (2022). "Synthetic Cooling Agents in US-marketed E-  
301 cigarette Refill Liquids and Popular Disposable Ecigarettes: Chemical Analysis and Risk  
302 Assessment." Nicotine Tob Res.
- 303 7. King, B. A., C. M. Jones, G. T. Baldwin and P. A. Briss (2020). "E-cigarette, or Vaping,  
304 Product Use-Associated Lung Injury: Looking Back, Moving Forward." Nicotine Tob Res  
305 **22**(Suppl 1): S96-S99.
- 306 8. Kuhns, D. B., D. A. L. Priel, J. Chu and K. A. Zarembler (2015). "Isolation and Functional  
307 Analysis of Human Neutrophils." Curr Protoc Immunol **111**: 7 23 21-27 23 16.
- 308 9. Leventhal, A., H. Dai, J. Barrington-Trimis and S. Sussman (2021). "'Ice' flavoured e-  
309 cigarette use among young adults." Tob Control.
- 310 10. Lu, S. J., L. Li, B. C. Duffy, M. A. Dittmar, L. A. Durocher, D. Panawennage, E. R.  
311 Delaney-Baldwin and D. C. Spink (2021). "Investigation of Vaping Fluids Recovered  
312 From New York State E-Cigarette or Vaping Product Use-Associated Lung Injury  
313 Patients." Front Chem **9**: 748935.
- 314 11. Lu, X., L. Sun, Z. Xie and D. Li (2022). "Perception of the Food and Drug Administration  
315 Electronic Cigarette Flavor Enforcement Policy on Twitter: Observational Study." JMIR  
316 Public Health Surveill **8**(3): e25697.
- 317 12. Muthumalage, T., T. Lamb, M. R. Friedman and I. Rahman (2019). "E-cigarette flavored  
318 pods induce inflammation, epithelial barrier dysfunction, and DNA damage in lung  
319 epithelial cells and monocytes." Sci Rep **9**(1): 19035.
- 320 13. Nair, V., M. Tran, R. Z. Behar, S. Zhai, X. Cui, R. Phandthong, Y. Wang, S. Pan, W. Luo,  
321 J. F. Pankow, D. C. Volz and P. Talbot (2020). "Menthol in electronic cigarettes: A  
322 contributor to respiratory disease?" Toxicol Appl Pharmacol **407**: 115238.
- 323 14. Ogunwale, M. A., M. Li, M. V. Ramakrishnam Raju, Y. Chen, M. H. Nantz, D. J. Conklin  
324 and X. A. Fu (2017). "Aldehyde Detection in Electronic Cigarette Aerosols." ACS Omega  
325 **2**(3): 1207-1214.
- 326 15. Pryor, W. A. and K. Stone (1993). "Oxidants in cigarette smoke. Radicals, hydrogen  
327 peroxide, peroxyxynitrate, and peroxyxynitrite." Ann N Y Acad Sci **686**: 12-27; discussion 27-  
328 18.

- 329 16. The Lancet Respiratory, M. (2020). "The EVALI outbreak and vaping in the COVID-19  
330 era." Lancet Respir Med **8**(9): 831.
- 331 17. Valavanidis, A., T. Vlachogianni and K. Fiotakis (2009). "Tobacco smoke: involvement of  
332 reactive oxygen species and stable free radicals in mechanisms of oxidative damage,  
333 carcinogenesis and synergistic effects with other respirable particles." Int J Environ Res  
334 Public Health **6**(2): 445-462.
- 335 18. van der Toorn, M., D. Rezayat, H. F. Kauffman, S. J. Bakker, R. O. Gans, G. H. Koeter,  
336 A. M. Choi, A. J. van Oosterhout and D. J. Slebos (2009). "Lipid-soluble components in  
337 cigarette smoke induce mitochondrial production of reactive oxygen species in lung  
338 epithelial cells." Am J Physiol Lung Cell Mol Physiol **297**(1): L109-114.
- 339 19. Wang, J., T. Zhang, C. J. Johnston, S. Y. Kim, M. J. Gaffrey, D. Chalupa, G. Feng, W. J.  
340 Qian, M. D. McGraw and C. Ansong (2020). "Protein thiol oxidation in the rat lung  
341 following e-cigarette exposure." Redox Biol **37**: 101758.
- 342 20. Wang, L., Y. Wang, J. Chen, X. M. Yang, X. T. Jiang, P. Liu and M. Li (2021).  
343 "Comparison of biological and transcriptomic effects of conventional cigarette and  
344 electronic cigarette smoke exposure at toxicological dose in BEAS-2B cells." Ecotoxicol  
345 Environ Saf **222**: 112472.
- 346 21. Wu, Z. H., Y. S. Liu, X. D. Li, T. Xu, J. Xu, X. M. Yang, R. Q. Ma and X. T. Jiang (2021).  
347 "Acute and subacute inhalation toxicity assessment of WS-23 in Sprague-Dawley rats." J  
348 Appl Toxicol **41**(11): 1826-1838.
- 349 22. Yogeswaran, S., T. Muthumalage and I. Rahman (2021). "Comparative Reactive Oxygen  
350 Species (ROS) Content among Various Flavored Disposable Vape Bars, including Cool  
351 (Iced) Flavored Bars." Toxics **9**(10).
- 352 23. Yogeswaran, S. and I. Rahman (2022). "Differences in Acellular Reactive Oxygen Species  
353 (ROS) Generation by E-Cigarettes Containing Synthetic Nicotine and Tobacco-Derived  
354 Nicotine." Toxics **10**(3).
- 355 24. Zhao, J., Y. Zhang, J. D. Sisler, J. Shaffer, S. S. Leonard, A. M. Morris, Y. Qian, D. Bello  
356 and P. Demokritou (2018). "Assessment of reactive oxygen species generated by electronic  
357 cigarettes using acellular and cellular approaches." J Hazard Mater **344**: 549-557.
- 358 25. Zuo, L. and D. Wijegunawardana (2021). "Redox Role of ROS and Inflammation in  
359 Pulmonary Diseases." Adv Exp Med Biol **1304**: 187-204.
- 360

### Individual Cigarette Puff Generator

#### **DSI Machine Settings**

- Total Puffs (20)
- 2 Puffs/min
- Individual Puff Length ( 3.0 seconds)
- Puff Volume: 55mL

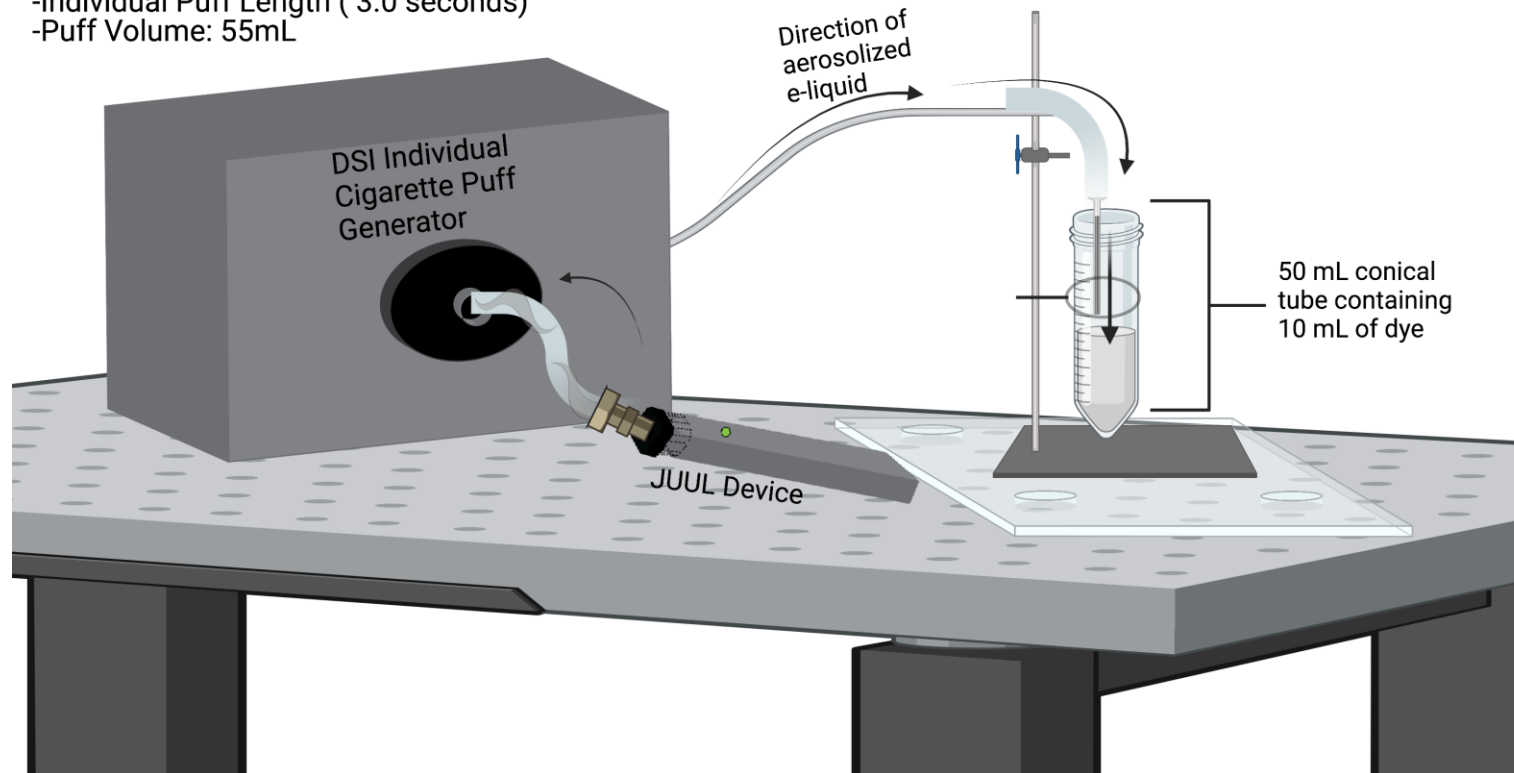

Figure 1. This pictogram shows the e-cigarette exposure generation system used in the study. E-cigarette aerosol was generated from the e-cigarette device using the artificial lung present in the Individual Cigarette Puff Generator. The e-cigarette aerosol then traveled to and was exposed to 10 mL of fluorogenic dye for one puff regimen at 1.5 L/min. One puff regimen consists of 20 total puffs (2 puffs/min) for 10 minutes, with the volume of each puff being 55.0 mL and each individual puff length lasting 3.0 seconds. Each conical tube was wrapped in aluminum foil to protect the fluorogenic dye from light. The entirety of the aerosolization and exposure process using the DSI machine was performed inside a chemical fume hood.

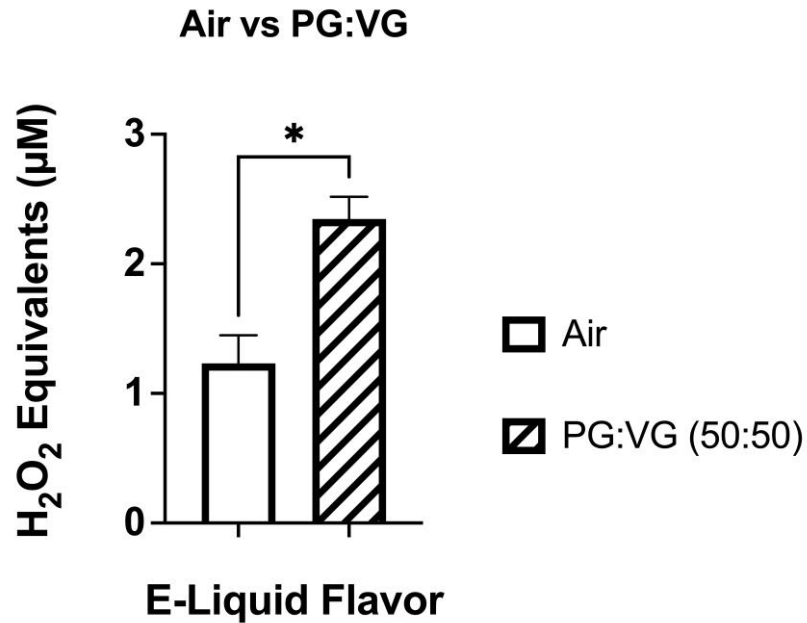

(a)

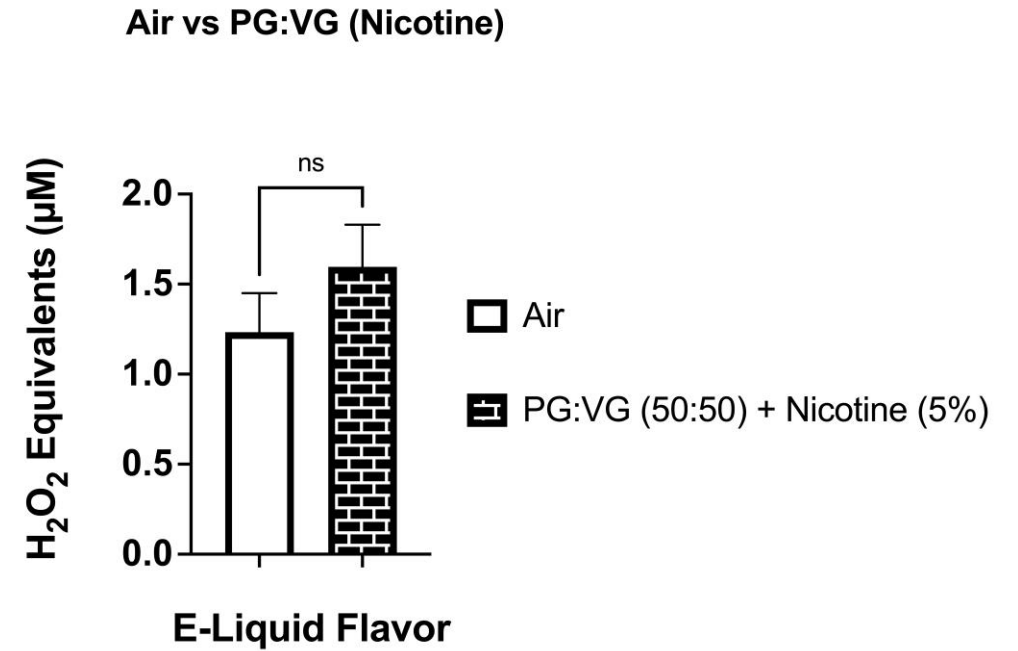

(b)

Figure 2. Comparisons between acellular ROS levels generated by aerosolized PG:VG (50:50), PG:VG (50:50) with nicotine, and a filtered air control. Acellular ROS was measured through hydrogen peroxide standards within aerosols generated from the previously mentioned e-liquids. Specifically, the e-liquid solutions were aerosolized using a JUUL device inserted into the Buxco Individual Cigarette Puff Generator. Data are represented as mean  $\pm$  SEM, and significance was determined using an unpaired t-test. The ratio of PG:VG used in each solution and the percentage of nicotine each solution is made up of is listed above in the graphs. Smoke generated from a 3R4F research cigarette was used as a positive control.\*  $p < 0.05$  and ns is abbreviated for “Non-Significant” versus air control ( $p > 0.05$ ). N=3

### Air vs PG:VG vs PG:VG & WS-23

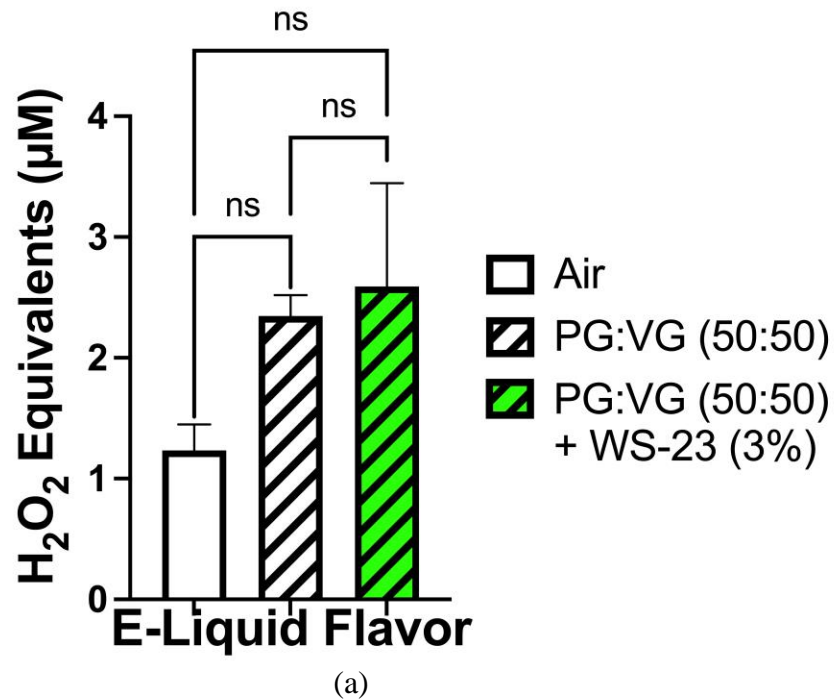

### Air vs PG:VG (Nicotine) vs PG:VG (Nicotine) + WS-23

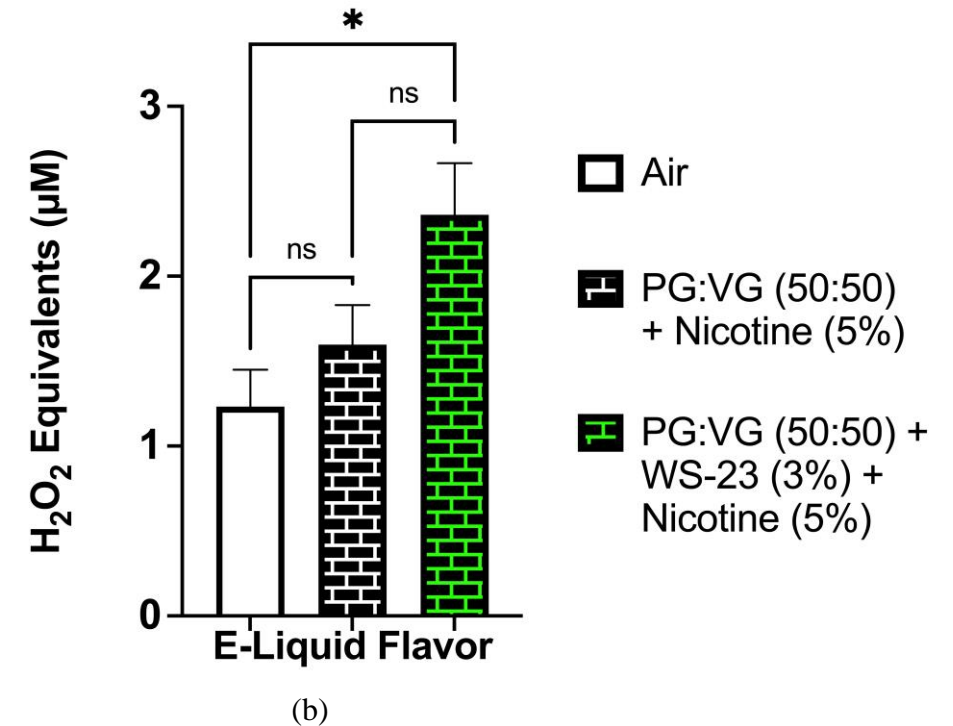

Figure 3. Comparisons between acellular ROS levels generated by aerosolized PG:VG (50:50), PG:VG (50:50) with nicotine, PG:VG (50:50) + WS-23, PG:VG (50:50) with nicotine + WS-23, and a filtered air control. Acellular ROS was measured through hydrogen peroxide standards within aerosols generated from the previously mentioned e-liquids. Specifically, the e-liquid solutions were aerosolized using a JUUL device inserted into the Buxco Individual Cigarette Puff Generator. Data are represented as mean  $\pm$  SEM, and significance was determined using an unpaired t-test. The ratio of PG:VG used in each solution and the percentage of nicotine and WS-23 each solution is made up of is listed above in the graphs. Smoke generated from a 3R4F research cigarette was used as a positive control.\*  $p < 0.05$  and ns is abbreviated for “Non-Significant” versus air control ( $p > 0.05$ ). N=3



### Air vs PG:VG vs PG:VG & Koolada

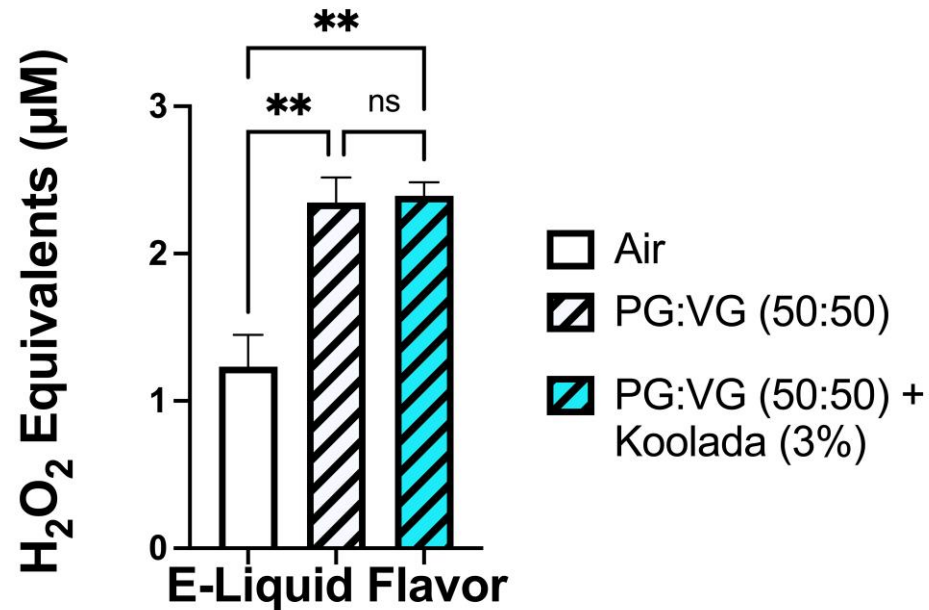

(a)

### Air vs PG:VG (Nicotine) vs PG:VG (Nicotine) & Koolada

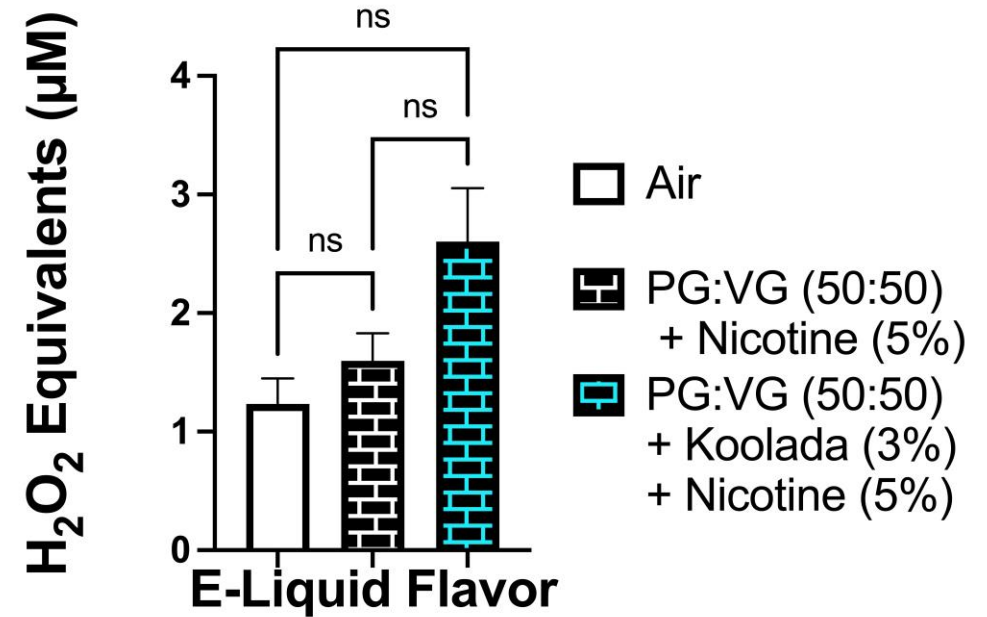

(b)

Figure 4. Comparisons between acellular ROS levels generated by aerosolized PG:VG (50:50), PG:VG (50:50) with nicotine, PG:VG (50:50) + Koolada, PG:VG (50:50) with nicotine + Koolada, and a filtered air control. Acellular ROS was measured through hydrogen peroxide standards within aerosols generated from the previously mentioned e-liquids. Specifically, the e-liquid solutions were aerosolized using a JUUL device inserted into the Buxco Individual Cigarette Puff Generator. Data are represented as mean  $\pm$  SEM, and significance was determined using an unpaired t-test. The ratio of PG:VG used in each solution and the percentage of nicotine and Koolada each solution is made up of is listed above in the graphs. Smoke generated from a 3R4F research cigarette was used as a positive control. \*\* $p < 0.05$  and ns is abbreviated for “Non-Significant” versus air control ( $p > 0.05$ ). N=3

### Coolant Solution Comparison (PG:VG)

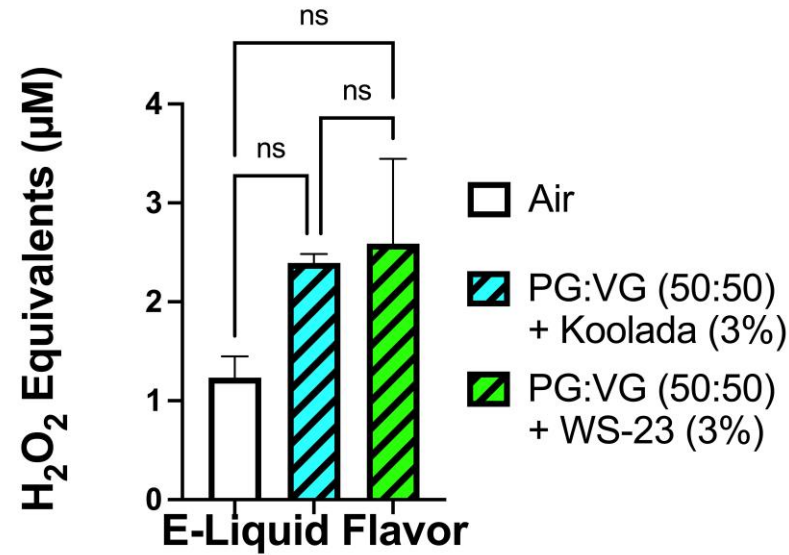

(a)

### Coolant Solution Comparison (PG:VG with Nicotine)

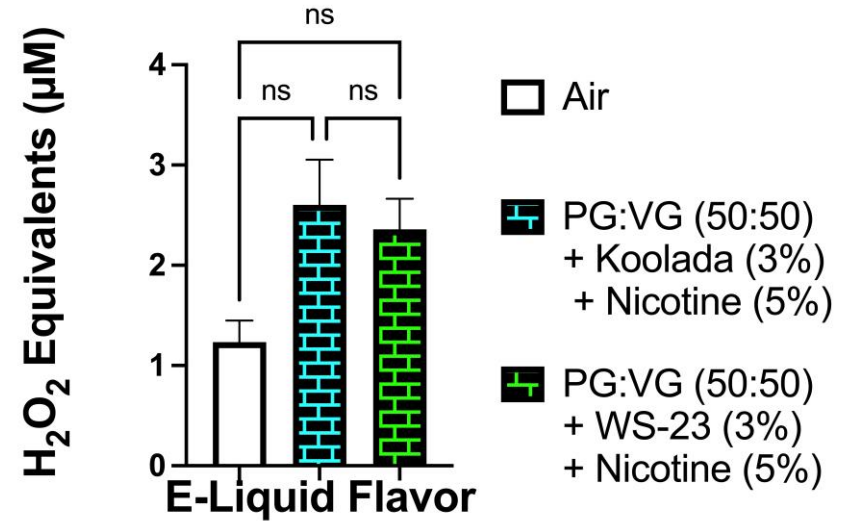

(b)

Figure 5. Comparisons between acellular ROS levels generated by aerosolized PG:VG (50:50) + Koolada, PG:VG (50:50) with nicotine + Koolada, PG:VG (50:50) + WS-23, PG:VG (50:50) with nicotine + WS-23, and a filtered air control. Acellular ROS was measured through hydrogen peroxide standards within aerosols generated from the previously mentioned e-liquids. Specifically, the e-liquid solutions were aerosolized using a JUUL device inserted into the Buxco Individual Cigarette Puff Generator. Data are represented as mean  $\pm$  SEM, and significance was determined using an unpaired t-test. The ratio of PG:VG used in each solution, the percentage of nicotine, WS-23, and Koolada each solution is made up of is listed above in the graphs. Smoke generated from a 3R4F research cigarette was used as a positive control. ns is abbreviated for “Non-Significant” versus air control ( $p > 0.05$ ). N=3
